# Supplementary material for: Epidemiological evidence on extra-medical use of prescription pain relievers: transitions from newly incident use to dependence among 12–21 year olds in the United States using meta-analysis, 2002–13
Source: PeerJ journal article supplement (doi:10.7717/peerj.1340), 2015-10-20

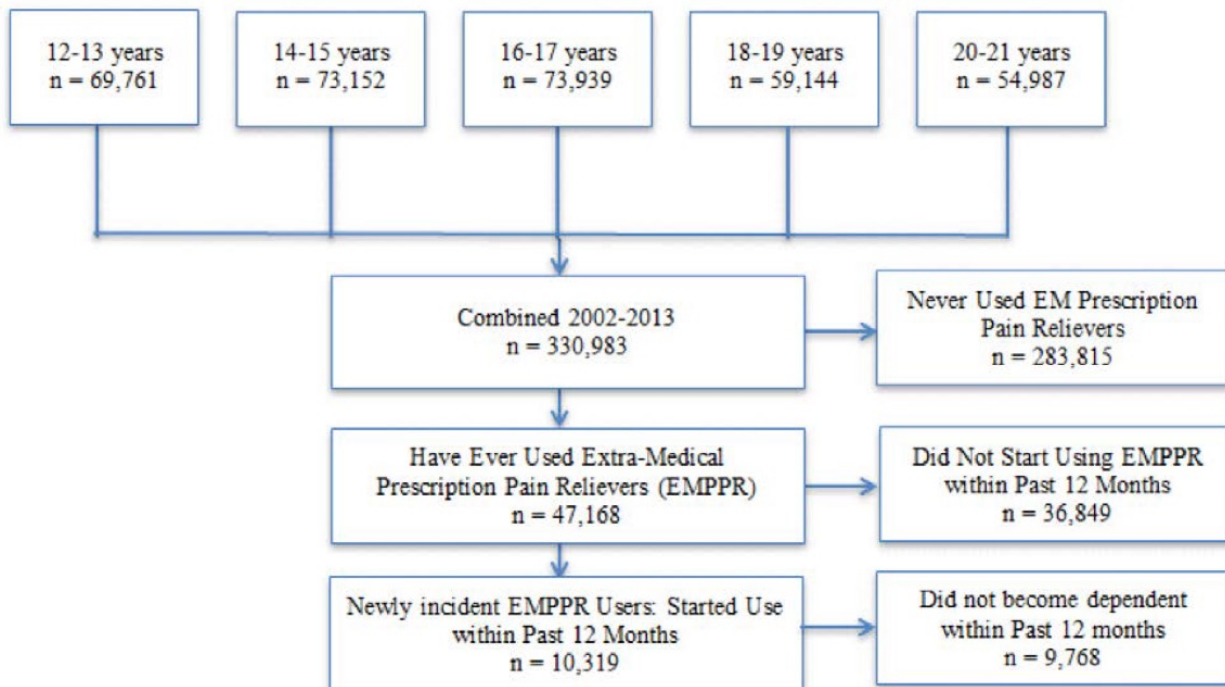

Supplement: mparker.peerjppr.figureS3_.pdf [file mparker.peerjppr.figureS3_.pdf]
